1 For submission to *Proteins: Structure, Function, and Bioinformatics*

2 3/2/22

3 **Analysis of CheW-like domains provides insights into organization of prokaryotic**  
4 **chemotaxis systems**

5 Luke R. Vass<sup>1,#a</sup>, Robert B. Bourret<sup>1\*</sup>, Clay A. Foster<sup>1,#b</sup>

6 <sup>1</sup>Department of Microbiology & Immunology, University of North Carolina, Chapel Hill,  
7 North Carolina, United States of America

8 <sup>#a</sup>Current Address: Department of Pathology, University of Virginia, Charlottesville,  
9 Virginia, United States of America

10 <sup>#b</sup>Current Address: Department of Pediatrics, Section Hematology/Oncology, University  
11 of Oklahoma Health Sciences Center, Oklahoma City, Oklahoma, United States of  
12 America

13 Running Title: CheW-like domains and chemotaxis systems

14 \*Corresponding author

15 Email: [bourret@med.unc.edu](mailto:bourret@med.unc.edu)

16

17 Co-author email addresses:

18 Luke R. Vass: [lukev3@vt.edu](mailto:lukev3@vt.edu)

19 Clay A. Foster: [clay-foster@ouhsc.edu](mailto:clay-foster@ouhsc.edu)

20 **Data Availability Statement:**

21 The data that support the findings of this study were derived from the following

22 resources available in the public domain: Pfam (release v.33), <http://pfam.xfam.org>;

23 MiST, <https://mistdb.com>. The data we compiled are available as Datasets S1 through

24 S4 in the Supplementary Material of this article.

25 **Conflict of Interest Statement:**

26 The authors declare no conflict of interest.

27

## 28 **ABSTRACT**

29           The ability to control locomotion in a dynamic environment provides a competitive  
30 advantage for microorganisms, thus driving the evolution of sophisticated regulatory  
31 systems. Nineteen known categories of chemotaxis systems control motility mediated  
32 by flagella and Type IV pili, plus other cellular functions. A key feature that distinguishes  
33 chemotaxis systems from generic two-component regulatory systems is separation of  
34 receptor and kinase functions into distinct proteins, linked by CheW scaffold proteins.  
35 This arrangement allows for formation of varied arrays with remarkable signaling  
36 properties. We recently analyzed sequences of CheW-like domains found in CheA  
37 kinases and CheW and CheV scaffold proteins. Sixteen *Architectures* of CheA, CheW,  
38 and CheV proteins contain ~94% of all CheW-like domains, forming six *Classes* with  
39 likely functional specializations.

40           We surveyed chemotaxis system categories and proteins containing CheW-like  
41 domains in ~1900 prokaryotic species, the most comprehensive analysis to date. The  
42 larger sample size revealed previously unknown insights. Co-occurrence analyses  
43 suggested that chemotaxis systems occur in non-random combinations within species,  
44 increasing our understanding of evolution of chemotaxis. Furthermore, many *Types* of  
45 CheW-like domains occurred predominantly with specific categories of chemotaxis  
46 systems, suggesting specialized functional interactions. For example, *Class 2 (Type*  
47 *CheW.IC)* domains exhibit properties spanning the primary *Classes* of CheW-like  
48 domains in CheA and CheW proteins. CheW.IC frequently co-occurred with methyl-  
49 accepting coiled coil (MAC) proteins, which contain both receptor and kinase functions.  
50 Although MAC proteins should not need CheW scaffolds to connect receptor and kinase

51 functions, co-occurrence suggested that MAC systems may nevertheless benefit from  
52 array formation facilitated by CheW.IC domains.

53 **KEYWORDS**

54 Bacterial chemotaxis systems, CheW-like domains, CheA, CheW, CheV

## 55 **1 | INTRODUCTION**

56 Two component signaling systems are found in bacteria, archaea, and certain  
57 eukaryotes such as plants and fungi.<sup>1,2</sup> Two-component pathways allow organisms to  
58 sense and respond to environmental stimuli in an organized and timely manner  
59 (reviewed in <sup>2</sup>). The most basic two-component system consists of a membrane-bound  
60 sensor histidine kinase that binds ATP and modulates an autophosphorylation reaction  
61 in response to an external stimulus. The resulting phosphoryl group is transferred to an  
62 aspartate residue in the receiver domain of a downstream response regulator to elicit an  
63 appropriate cellular response. However, two-component pathways often exhibit more  
64 complexity, incorporating additional proteins to form branching signaling networks  
65 (reviewed in <sup>3</sup>). This increased complexity provides an opportunity to fine-tune the  
66 signal-response characteristics of a given pathway, tailoring the system to better suit the  
67 needs of the organism (various advantages are summarized in <sup>4</sup>).

68 The chemotaxis pathway is one of the most well-studied two-component  
69 systems<sup>5</sup> and is present in some form in nearly every motile microorganism.  
70 Chemotaxis is a regulatory strategy used to direct the movement of an organism  
71 towards resources (attractants) or away from undesirable substances (repellants).  
72 Variations on the chemotaxis system allow for locomotion in response to a variety of  
73 physicochemical parameters such as temperature, pH, magnetism, etc., in addition to  
74 nutrients.<sup>6-10</sup> The pathway utilizes a diverse repertoire of transmembrane environmental  
75 sensors to detect properties of interest. The sensors, known as chemoreceptors (also  
76 called methyl-accepting chemotaxis proteins, or MCPs), typically form mixed  
77 transmembrane arrays with remarkable, highly customizable signaling properties,

78 including wide dynamic ranges, integration of mixed inputs, cooperativity, and rapid  
79 signal amplification potential.<sup>11</sup> The sophisticated information processing capabilities of  
80 the chemotaxis system are advantageous not only for general survival, but also for  
81 invasion-, colonization-, and virulence-related processes in pathogenic  
82 microorganisms.<sup>12-16</sup>

83         The chemotaxis pathway of *Escherichia coli* has been thoroughly characterized  
84 and is an example of a two-component system that incorporates additional proteins to  
85 achieve a more rapid and coordinated response.<sup>17</sup> The pathway begins at a  
86 transmembrane array of chemoreceptors. Activation of the sensor array depends on  
87 detection of an environmental stimulus and the methylation status of the receptors.  
88 Following detection, a stimulus is converted into receptor conformational changes to  
89 initiate processing and propagation. The signal is passed to the histidine kinase, CheA,  
90 which integrates information from multiple receptors through autophosphorylation after  
91 summing positive and negative stimuli.<sup>18,19</sup> The signal path then splits into “excitation”  
92 and “adaptation” branches. In the excitation path, phosphoryl groups are passed to the  
93 response regulator CheY. Phosphorylation alters the equilibria between active and  
94 inactive conformations in the CheY population, which ultimately modulates flagellar  
95 motor behavior and motility. The adaptation path in *E. coli* features CheR and CheB.  
96 CheR includes a methyltransferase domain that steadily adds methyl groups to the  
97 chemoreceptors, independent of environmental stimuli. CheB is a response regulator  
98 that includes a methylesterase domain whose activity is tightly regulated by  
99 phosphorylation and removes methyl groups from the chemoreceptors in response to a  
100 sufficient environmental change. The adaptation path forms a delayed negative

101 feedback loop, imparting a “memory” to the system and allowing the organism to both  
102 follow a stimulus gradient and to reset upon reaching a uniform environment. Some  
103 chemotaxis systems also incorporate separate phosphatases, such as CheZ, to  
104 catalyze the removal of phosphoryl groups and terminate the response at a specific  
105 point in the pathway.<sup>20</sup> Many organisms encode multiple chemotaxis systems for  
106 regulating multiple forms of propulsion and/or gene expression<sup>5</sup>.

107 An important distinction between a generic two-component pathway and a  
108 chemotaxis system is the separation of sensor and kinase functions into distinct protein  
109 species. Physical separation allows CheA kinases to integrate information from many  
110 different chemoreceptors, substantially enhancing the utility of the system.<sup>18,19,21</sup> This  
111 integration is facilitated by CheW proteins, which act as scaffolds between the various  
112 receptors and CheA kinases.<sup>22,23</sup> The classical architecture of CheA includes an  
113 histidine phosphotransfer (Hpt) domain (Pfam ID PF01627) containing the site of  
114 phosphorylation (a His residue), a dimerization domain (PF02895), an HATPase\_c ATP  
115 binding and catalytic domain (PF02518), and a CheW-like domain (PF01584).<sup>24</sup> The  
116 CheW-like domain in *E. coli* CheA interacts with its counterpart CheW-like domain in  
117 standalone CheW proteins and also with cytoplasmic portions of the receptors to form  
118 MCP signaling arrays. The formation of supramolecular MCP•CheW•CheA oligomers is  
119 an essential part of the system and leads to CheA activation, signal propagation, and  
120 ultimately a downstream shift in flagellar behavior and/or locomotion.<sup>21,23,25</sup>

121 Most existing information on CheW-like domains describes the canonical,  
122 standalone CheW protein (the most abundant form in nature).<sup>25</sup> The structure of CheW  
123 consists of two connected  $\beta$ -barrels that form a bridge between the cytoplasmic regions

124 of a receptor and the kinase CheA. The interactions between the free species of CheW  
125 and its partners (MCPs and CheAs) have been well-characterized for several microbial  
126 species, particularly *E. coli*.<sup>26-30</sup> However, the CheW-like domain itself is ubiquitous and  
127 can be found embedded in dozens of distinct architectures encompassing nearly every  
128 component and layer of the microbial chemotaxis system, e.g. fused to CheR or even  
129 CheZ.<sup>31</sup> CheW-like domains are evolutionarily related, regardless of their flanking  
130 architectures, and are relatively identifiable with traditional domain detection methods.  
131 However, the defining characteristics that distinguish the functionality of the domain  
132 within these different contexts are unknown.

133         The most common occurrence of CheW-like domains other than CheA- or  
134 CheW-lineage proteins (-lineage referring to proteins that can be loosely characterized  
135 as analogous to the canonical CheA and standalone CheW proteins in *E. coli*) is fused  
136 to a receiver domain in CheV proteins (reviewed in <sup>22,32</sup>). Various commonly studied  
137 organisms, including *Bacillus subtilis*, *Helicobacter pylori*, and *Vibrio cholerae*, encode  
138 one or more CheV proteins. While CheV proteins are present in approximately one-third  
139 of all chemotaxis systems, their role(s) are still poorly understood.<sup>31</sup> CheV is thought to  
140 be involved in both CheA modulation/MCP adaptation and array formation/polar  
141 localization.<sup>33,34</sup> The receiver domain of CheV may also serve as a general phosphate  
142 sink for the system.<sup>32,35</sup>

143         A landmark study by Wuichet and Zhulin established an evolutionary  
144 classification of chemotaxis signaling systems in prokaryotes<sup>31</sup>, summarized here. The  
145 core components of essentially all chemotaxis systems, as outlined above, are the  
146 MCP•CheW•CheA arrays, the CheB and CheR adaptation enzymes, and CheY



147 response regulators. Chemotaxis systems often have multiple MCPs and CheW  
148 proteins, and it is technically difficult to distinguish CheY from other single domain  
149 response regulators. Therefore, to provide a consistent foundation, the original  
150 classification was based on phylogenetic trees of CheA/CheB/CheR sequences and  
151 supported by certain other phylogenetic markers. There are 19 known categories of  
152 standard chemotaxis systems, each containing characteristic arrangements of *che*  
153 genes, distinct sets of auxiliary components (CheC phosphatase, CheD deamidase,  
154 CheV scaffold protein, CheX phosphatase, and/or CheZ phosphatase), and often  
155 unique architectures for certain core components. Seventeen categories of chemotaxis  
156 systems (F1 through F17) control flagellar motility, one controls Type IV pili (Tfp), and  
157 one controls alternative (non-motility) cellular functions (ACF). In addition, there are two  
158 categories of related chemotaxis systems based on methyl-accepting coiled coil (MAC)  
159 proteins, which contain both receptor and kinase functions, rather than separate MCP  
160 and CheA proteins.

161         A recent companion paper describes our classification (Figure 1) of the  
162 numerous architectural contexts of CheW-like domains and the implications thereof.<sup>36</sup>  
163 Nearly all (~94%) CheW-like domains are encompassed by 16 distinct *Architectures*  
164 (Figure 2). Because certain *Architectures* include multiple CheW-like domains, there are  
165 21 major *Contexts* for CheW-like domains. The CheW.I *Architecture/Context* consists of  
166 three *Types* of sequences, whereas the other 20 *Contexts* each correspond to a single  
167 *Type*. As determined by the terminal level of our analysis, all 23 *Types* of CheW-like  
168 domain sequences sort into five or six *Classes*, likely related to specific functional  
169 specializations. Most CheW-like domains in CheW- and CheV-lineage proteins belong

170 to *Class 1 (Type CheW.IB)*. Most CheW-like domains in CheA-lineage proteins belong  
171 to *Class 3*, except for the CheA.VII and CheA.X *Architectures (Class 4*, which contain  
172 multiple Hpt domains) and the CheA.V.2 and CheA.VI.2 *Contexts (Class 5*, the C-  
173 terminal CheW-like domains in CheA proteins with two such domains). The rare (~1%)  
174 CheW.IC *Type of CheW-like domains (Class 2)* is found in CheA-lineage and CheW-  
175 lineage proteins and exhibits properties of both. About 20% of CheW-like domains in  
176 CheW-lineage proteins (*Class 6, Type CheW.IA*) appear subtly different from *Class 1*  
177 and may form yet another specialized *Class*.

178         In this work, we combined our classification scheme of CheA-, CheW-, and  
179 CheV-lineage (CheW-like domain containing) proteins<sup>36</sup> with that of Wuichet and Zhulin  
180 for other chemotaxis proteins<sup>31</sup> to gain additional insights into the evolution and  
181 organization of chemotaxis systems. We found that (i) chemotaxis system categories  
182 occur in non-random combinations within microbial species, and (ii) specific  
183 *Architectures* of CheA/CheW proteins are preferentially associated with specific  
184 chemotaxis system categories, suggesting functional interactions.

## 185 **2 | MATERIALS AND METHODS**

### 186 **2.1 | Protein sequence database and co-occurrence analysis**

187 Analysis of CheW-like domains (PF01584) was described in <sup>36</sup>, using sequences  
188 sourced from Representative Proteome 35 (RP35)<sup>37</sup> and the Pfam database (version  
189 33, obtained May 2020).<sup>38</sup>

190 To analyze the co-occurrence (presence-absence) patterns of the various  
191 chemotaxis components encoded by proteomes within the RP35 sequence set, proteins  
192 containing one or more of the following domains were extracted: MCP (PF00015); CheR  
193 (PF01739); CheB (PF01339); CheD (PF03975); CheZ (PF04344); CheCX (also simply  
194 called CheC, PF04509/PF13690).<sup>38</sup> Receiver domain-containing proteins orthologous to  
195 CheY were excluded for the sake of interpretability. Full protein sequences (excluding  
196 the previously analyzed CheW-containing proteins) were scanned and classified with  
197 HMMER3 (version 3.3) using the previously described chemotaxis system models  
198 (utilized by the MiST database; version 3.0).<sup>31,39-41</sup> A combined frequency table was  
199 generated by merging the previously classified CheW-containing architectures with the  
200 other chemotaxis components by organism. Components with fewer than 20 positive  
201 occurrences were discarded from the analysis. The resulting count matrix of distinct  
202 chemotaxis proteins (encoded by 1887 distinct proteomes) was used to generate a  
203 heatmap (using the R package ComplexHeatmap, version 2.7.11) of the co-occurrence  
204 patterns within the representative proteomes.<sup>42</sup> The taxize package in R (version  
205 0.9.99.947)<sup>43</sup> was used to assign putative phyla and classes to the batch of relevant  
206 organisms (sourced from the NCBI Taxonomy Browser<sup>44</sup>). Assignments were visualized  
207 as row/column annotations with ComplexHeatmap. Rows (components) and columns

208 (species) were grouped in an unsupervised manner by hierarchical clustering, based on  
209 Spearman correlation, using Ward's clustering method (option "ward.D2"). The resulting  
210 dendrograms (both row and column) were split by height (using the `cutree()` function, as  
211 implemented by the `row_split/column_split` options) into putative functional "blocs" of  
212 chemotaxis components. Various heights were examined to optimize interpretability  
213 (data not shown).

214 To analyze the co-occurrence patterns of the chemotaxis classes themselves,  
215 rather than the individual components (see Figure 4; matching assignments made with  
216 the functional blocs in Figure 3), the original matrix generated to create Figure 3 was  
217 binarized. Rows featuring CheA, CheW, CheV and MCP paralogs were first removed. A  
218 binary scheme was then applied for each individual chemotaxis category (F1, F2, F4,  
219 F5, F6, F7, F7.z, F8, F9, F10, Tfp, ACF, MAC1, MAC2 and Uncat). If a given organism  
220 contained at least one of the corresponding components (CheB/C/D/R/Z) for a  
221 chemotaxis category, the category was considered present in the final table (=1). Those  
222 lacking were assigned absent (=0). A small percentage of organisms (<5%) lacked  
223 auxiliary components entirely and were excluded. A new heatmap was generated in a  
224 similar manner using `ComplexHeatmap` to re-cluster the proteomes (i.e., columns; 1797  
225 distinct organisms). Row order was maintained to match Figure 3.

## 226 **2.2 | Phyletic direct coupling analysis (PhyDCA) and network generation**

227 The frequencies used to create the co-occurrence heatmap (covering the full,  
228 non-filtered complement of chemotaxis components) were also converted into a binary  
229 phylogenetic profile matrix to analyze pairwise evolutionary couplings. Data were  
230 analyzed with PhyDCA (using the `mfDCA` implementation) to estimate relevant phyletic

231 pairings using a global statistical modelling approach.<sup>45</sup> The phyletic coupling ( $J_{ij}$ )  
232 between two domains and/or components in our data was used to estimate the  
233 favorability of finding multiple elements within the same species, corresponding to the  
234 principle that a biological process (i.e., chemotaxis) would require both components to  
235 function and produce a strong positive coupling. A negative coupling could also be  
236 interpreted as alternative solutions for similar functionality in a given system. We took  
237 the top 125 strongest positive pairwise couplings and created a non-directed graph for  
238 visualization purposes using the R packages igraph and ggraph (using the  
239 Fruchterman-Reingold algorithm).<sup>46-48</sup>

## 240 **3 | RESULTS AND DISCUSSION**

### 241 **3.1 | Combinations of chemotaxis system categories are non-randomly** 242 **distributed across prokaryotic species**

243 We previously extracted all proteins that contained CheW-like domains and  
244 belonged to the 16 *Architectures* (Figure 2) that account for ~94% of CheW-like  
245 domains within the Representative Proteome 35 (RP35) dataset.<sup>36</sup> Using the same  
246 dataset, we extracted the remaining known chemotaxis proteins (with the exception of  
247 CheY), resulting in components from 1887 distinct proteomes. MCPs were classified by  
248 number of heptad repeats,<sup>49</sup> whereas CheB, CheC (including closely related CheX<sup>50</sup>),  
249 CheD, CheR, and CheZ proteins were assigned to the chemotaxis system categories of  
250 Wuichet and Zhulin.<sup>31</sup> We counted the number of components in each proteome and  
251 organized the data into a frequency matrix (Dataset S1), with organisms in columns and  
252 distinct chemotaxis components in rows. Hierarchical clustering was performed to  
253 optimally group organisms and chemotaxis proteins with similar co-occurrence patterns.  
254 The results were visualized in a composite heatmap (Figure 3).

255 The information presented by Figure 3 is challengingly dense, but salient  
256 features can be identified and discussed most easily using a grid coordinate system in  
257 which blocs are identified by assigned chemotaxis system class (rows, containing  
258 individual protein components; labeled on left with silver boxes) and representative  
259 proteome cluster (columns, containing distinct organisms; labeled on bottom with  
260 numbers as proteome clusters). First, Figure 3 does not include eight categories (F3 or  
261 F11 through F17) of chemotaxis systems. The aforementioned categories were rare in  
262 the surveyed proteomes (as previously observed<sup>31</sup>) and so were excluded from Figure 3

263 to facilitate interpretability. Second, the dominant feature of Figure 3 is that the data  
264 primarily clustered (in an unsupervised manner) into recognizable blocs, as a function of  
265 proteome and putative chemotaxis system category (row dendrogram not shown). Such  
266 a phenomenon strongly suggested that the data were linked in both dimensions (across  
267 chemotaxis system categories and across proteomes). We explore multiple aspects of  
268 the relationships between chemotaxis proteins (or components), chemotaxis system  
269 categories, and proteomes in the following sections.

270         If each species (proteome) encoded a single category of chemotaxis system,  
271 then two-dimensional clustering would be trivial, and proteomes would group perfectly  
272 into functional blocs by system category. However, >50% of all prokaryotic genomes  
273 that encode chemotaxis systems contain multiple systems (first determined in <sup>31</sup> and  
274 again corroborated by our work). With many known categories of chemotaxis systems, if  
275 combinations featuring multiple categories in a single species were random, then  
276 clustering by species would be disrupted, precluding the previously described functional  
277 blocs. The observed data structure in Figure 3 suggested that a restricted subset of  
278 common combinations of chemotaxis systems is evolutionarily favored. Preferred  
279 combinations must be either ancient (passed on to descendants of common ancestors)  
280 and/or are synergistically beneficial (arose independently multiple times). In either case,  
281 horizontal gene transfer of chemotaxis systems between species has not erased the  
282 pattern of combinatorial preferences in nature. Additionally, multiple chemotaxis  
283 systems present within the same species may serve as substrates for continuing  
284 evolution. For example, the modern class F7 chemotaxis system of *E. coli* evolved from  
285 a merger of the more ancient versions of class F6 and F7 systems.<sup>51</sup>

## 286 **3.2 | Presence-absence analysis reveals evolutionarily favorable category** 287 **combinations in organisms with multiple chemotaxis systems**

288 By converting the frequency table of components used to generate Figure 3 into  
289 a simplified, binary presence/absence matrix featuring only the chemotaxis categories  
290 themselves, we next determined the most common naturally occurring combinations of  
291 chemotaxis system categories. Dataset S2 provides a full breakdown with  
292 corresponding proteome counts. The simplified matrix was also used to generate a  
293 heatmap displaying the presence/absence of each chemotaxis system category across  
294 species (Figure 4). We used Dataset S2 to calculate the total number of organisms  
295 encoding any given chemotaxis system category, irrespective of the presence/absence  
296 of other chemotaxis system categories (or paralogous instances of the same category),  
297 as well as the relative abundances of the various categories (Dataset S3).

298 We first sought to compare the distribution of chemotaxis system categories  
299 across species with the evolutionary relationships between the chemotaxis systems.  
300 The phylogenetic tree of chemotaxis systems features three main branches (here  
301 arbitrarily designated Branches 1, 2 and 3), with Branch 2 exhibiting three sub-  
302 Branches.<sup>31</sup> The most common 10% of chemotaxis category combinations observed in  
303 Dataset S2 accounted for two-thirds of the proteomes in our study and are displayed in  
304 relation to the various Branches in Table 1, with cross-referencing to their locations in  
305 Figure 4. Approximately a third of the proteomes encoded only a single category of  
306 chemotaxis system (Table 1, top).

307 We next focused on the proteomes encoding multiple chemotaxis systems, first  
308 examining pairwise combinations of categories found within the same Branch (Table 1,



309 middle). In general, flagellar chemotaxis system categories within the same Branch  
310 (F1/F2, F4/F9/F10, and F7.z/F7/F8) co-occurred at substantially higher frequencies in  
311 Dataset S2 than would be expected based on frequencies of the constituent categories  
312 from Dataset S3 (calculations not shown). In contrast, the combination of categories  
313 F5/F6 occurred approximately five times less frequently than expected using the same  
314 relationship, implying some form of negative selection. It seems plausible that the  
315 components of the two categories (F5/F6) may interfere with one another. In contrast to  
316 the flagellar systems, categories ACF/Tfp and MAC1/2 both co-occurred at frequencies  
317 consistent with a random distribution. Overall, our findings imply that flagellar  
318 chemotaxis systems are not independent from one another, as might be expected if  
319 they control the same flagellar motors (e.g., having closely related CheY proteins to  
320 control the same motor could be advantageous). In contrast, ACF and Tfp systems  
321 appeared to act independently from each other, as did MAC1 and MAC2 systems.

322 Over 50% of all proteomes encoding multiple distinct chemotaxis systems in our  
323 dataset included categories from disparate Branches of the classification tree (Table 1  
324 bottom and Dataset S2), suggesting highly diverse origins for most systems. We found  
325 that most outgroup combinations occurred at frequencies relatively consistent with a  
326 random distribution. A notable exception was class F7.z, which occurred with categories  
327 in outgroup Branches much less frequently than expected (consistent with a  
328 strong/semi-exclusive linkage between F7.z/F7 and F7.z/F8). Additionally, class F9 co-  
329 occurred with both F5 and F8 systems more frequently than expected, though we are  
330 uncertain as to the significance of this observation.

331 Finally, we examined the co-occurrent relationships between the flagellar  
332 chemotaxis system classes and the ACF/Tfp/MAC1/MAC2 systems. *A priori*, we  
333 speculated that the non-flagellar systems would operate independently from the  
334 flagellar-controlling classes, revealing no obvious selective pressure(s). While the  
335 majority of pairwise combinations between flagellar and non-flagellar systems  
336 (approximately 67%) supported our prediction, a full third deviated substantially  
337 (calculations not shown). One-quarter of pairwise combinations were observed at lower-  
338 than-expected frequencies, with nearly half of the cases of negative selection involving  
339 either F1 or F2 systems. Ten percent of pairwise combinations were observed at higher-  
340 than-expected frequencies, with nearly half of the cases of positive selection involving  
341 F10 systems. Once again, the significance of the deviating combinations is not  
342 immediately apparent.

343 The observations summarized in this section (and in Table 1/Figure 4) were only  
344 possible because we sampled proteomes from a large number (1887) of distinct  
345 organisms. Though members of some prokaryotic Phyla tend to encode particular  
346 categories of chemotaxis systems, the topologies of the chemotaxis and species  
347 classification trees do not match<sup>31,52</sup>, implying different evolutionary paths. The primary  
348 combinations of chemotaxis system categories (Table 1) and their non-random nature  
349 (Figure 4) may provide clues into the evolution of chemotaxis systems.

### 350 **3.3 | Matching *Architectures* of proteins containing CheW-like domains to** 351 **preferred chemotaxis system categories**

352 Examining the functional blocs revealed by clustering in Figure 3 suggested that  
353 various *Architectures* of CheA and CheW proteins are differentially favored by divergent

354 chemotaxis systems. In particular, many *Architectures* clustered with components  
355 belonging to one chemotaxis system category. Wuichet and Zhulin described eight  
356 cases of distinct architectures for proteins containing CheW-like domains that were  
357 characteristic of specific chemotaxis system categories.<sup>31</sup> The four *Architectures* noted  
358 by Wuichet and Zhulin that were sufficiently abundant to be included in our study were  
359 CheA.III/CheA.IV, CheA.VI, CheA.XII, and CheW.III, which were linked to categories  
360 ACF/F3, F5, F4, and F9, respectively. Our data confirmed most previous assignments.  
361 Our larger sample size enabled us to also propose multiple additional assignments.  
362 Qualitative assignments of specific *Architectures* to specific chemotaxis systems  
363 inferred from sorting patterns in Figure 3 are summarized in Table 2. Quantitative  
364 analyses described in Section 3.4 strengthen and extend these observations. The new  
365 relationships identified in our work link *Architectures* CheA.I, CheA.II, CheA.V,  
366 CheA.VII, CheA.VIII, CheV.I, CheW.IA, CheW.IB, CheW.IC, and CheW.II with  
367 chemotaxis system categories F7/F8, F1, F5, F7.z, F7.z, F1/F6, F5/F6/F7.z, F1/F7/F8,  
368 MAC1, and F8/ACF, respectively. The additional assignments substantially expand our  
369 understanding of chemotaxis system organization.

370         Several individual rows in Figure 3 exhibited distributions from which we could  
371 glean additional insights. Prominent components spanning numerous proteome clusters  
372 included mcp.44H, mcp.24H, mcp.40H, mcp.34H, and mcp.36H (found in F1, F6, N/A,  
373 F8, and F7 blocs respectively); CheW.IB (F8 blocs); CheW.IA, which includes most  
374 CheW proteins (N/A blocs above F8); and CheA.I, the simplest and most common  
375 CheA *Architecture* (F7 blocs). The listed components are known to constitute the core  
376 signaling pathway shared by all chemotaxis systems. CheV.I (the sole version of CheV

377 detected in any significant abundance; see <sup>36</sup>), found in nearly a third of all chemotaxis  
378 systems in nature, also spanned many proteome clusters (F6 blocs). Strikingly, the  
379 occurrence of CheV.I correlated well with the mcp.40H type of chemoreceptor, strongly  
380 suggesting preferential interaction(s) (N/A blocs above F8).

381 Figure 3 also revealed several key features shared by the MAC1/2 chemotaxis  
382 categories. Methyl-accepting coiled-coil (MAC) proteins are closely related to  
383 chemotaxis proteins but, to the best of our knowledge, have not been experimentally  
384 characterized in any respect. MAC proteins include apparent chemoreceptor and kinase  
385 domains, and either incorporate (MAC1) or are associated with (MAC2) CheB and  
386 CheR related domains.<sup>31</sup> It is unclear whether MAC proteins are evolutionary precursors  
387 of canonical chemotaxis systems or degenerate remnants. Proteome clusters 16, 17,  
388 and 18 featured high concentrations of organisms encoding MAC1 and/or MAC2  
389 components but seemingly lacked other types of chemotaxis systems (MAC1 and  
390 MAC2 blocs). MAC systems were also scattered across numerous proteome clusters in  
391 Figure 3, rather than remaining constrained to contiguous blocs. Such a distribution  
392 suggested substantial phylogenetic prolificacy. Wuichet and Zhulin found that ~80% of  
393 species with MAC systems encode additional chemotaxis systems.<sup>31</sup> The distribution of  
394 MAC systems seen in Figure 3, based on our much larger sample size, supported and  
395 strengthened the original observation.

### 396 **3.4 | Co-evolutionary analysis reveals functional communities of chemotaxis** 397 **components**

398 Due to the complex nature of the information represented in Figure 3 (and the  
399 relative inability of the human eye to untangle multivariate correlations), we sought a

400 way to simplify the co-occurrence probabilities of individual components observed in the  
401 various chemotaxis systems in nature. The traditional approach to phylogenetic profiling  
402 utilizes some form of correlation metric, such as Hamming distance or Pearson  
403 correlation, to transform a simple binary matrix representing presence (1) or absence  
404 (0) of specific components/proteins/genes in various species into a corresponding  
405 interaction network. However, classical profiling suffers from several disadvantages,  
406 such as the influence of “intermediate” effects on apparent direct couplings (meaning  
407 that if A co-evolves with B, and B co-evolves with C, A may also appear to co-evolve  
408 with C). A more recent approach introduced the concept of direct coupling analysis, a  
409 statistical modeling technique able to distinguish between direct and more indirect co-  
410 evolutionary signals, to the profiling of presence-absence patterns.<sup>45</sup> This method,  
411 called Phyletic Direct Coupling Analysis, or PhyDCA, has demonstrated substantially  
412 increased accuracy compared to the more traditional correlation-based approaches and  
413 provided a convenient means by which to quantify the relationships presented in Figure  
414 3. We converted our co-occurrence frequency table underlying Figure 3 (featuring the  
415 full list of chemotaxis components) into a simple binary presence-absence matrix and  
416 used PhyDCA to generate quantitative, pairwise phyletic couplings between individual  
417 components/domains. We then took the top 125 (~4%) strongest positive couplings (i.e.,  
418 the presence of one component favors the presence of the other) and generated a non-  
419 directed graph to visualize the web of co-evolutionary signals (Figure 5). The complete  
420 list of pairwise coupling strengths (>3000 pairs) is in Dataset S4.

421         The relationships revealed by Figure 5 largely corroborated the clustering  
422 patterns of Figure 3 and the assignments made in Table 2. Individual chemotaxis

423 components typically associated closely with others of the same system category  
424 (represented by shared colors in Figure 5), but less strongly to nodes outside the same  
425 group. The network representation was particularly useful for visualizing relationships  
426 between the disparate categories/chemoreceptors and the CheW-/CheV-lineage  
427 *Architectures*. Most of the chemotaxis categories could be traced to a least one CheW-  
428 lineage and CheA-lineage component in relatively short order. Category F2 components  
429 and mcp.48H appeared as a cluster unconnected to other components in Figure 5, but  
430 all exhibited couplings in the top ~10% to CheA.II (Dataset S4) and hence linked to the  
431 F1 chemotaxis system.

432         The strong connections between components observed in Figure 5 allowed us to  
433 confirm many of the chemotaxis system class assignments proposed in Table 2 (based  
434 on observations from Figure 3), as well as to infer several additional novel assignments.  
435 Key observations derived from Figure 5 are described in the following paragraphs.

436         Figure 3 shows four groups of components (labeled N/A or uncategorized) that  
437 sorted into isolated blocs rather than associating with the standard chemotaxis system  
438 categories. Figure 5 suggests that the components were not associated with one  
439 another through co-evolutionary processes, but rather were dispersed and associated  
440 with a diverse range of other proteins. One explanation for the differences between the  
441 results in Figures 3 and 5 is correlation of individual components with multiple  
442 chemotaxis system categories. Such a phenomenon would likely facilitate linkage in  
443 Figure 5 but confound the clustering procedure used for Figure 3.

444         CheW.IB (the most common *Type* of CheW) sorted with chemotaxis system  
445 category F8 in Figure 3 but connected primarily with the F1 and F7 systems in Figure 5.

446 This pattern is consistent with the fact that F1, F7, and F8 are the most abundant  
447 chemotaxis system categories (Dataset S3, Ref. <sup>31</sup>). CheW.IB linked with CheA.I and  
448 CheA.II (the two most common CheA *Architectures*<sup>36</sup>) in Figure 5. CheW.IB also  
449 connected to multiple types of MCPs in Figure 5. All described linkages are consistent  
450 with common core components utilized by many different categories of chemotaxis  
451 systems.

452 The CheW.IA *Type* comprises *Class 6* of CheW-like domains and makes up  
453 ~20% of CheW.I proteins.<sup>36</sup> CheW.IA is subtly distinguishable from CheW.IB and  
454 CheV.I *Types* of CheW-like domains (*Class 1*) by some (but not all) methods of  
455 sequence analysis.<sup>36</sup> In Figure 5, CheW.IA made direct connections to various  
456 chemoreceptors, but not to any CheA proteins (i.e., phyletic coupling of CheW.IA was  
457 stronger to MCPs than to CheA-lineage proteins). We speculate that the distinction  
458 between *Class 1* and *Class 6* CheW-like domains is that the latter exhibit greater  
459 specificity or preference for interactions with certain classes of MCPs (e.g., mcp.40H,  
460 mcp.38H). Note that CheW.IA sorted with mcp.40H in Figure 3 (N/A bloc above F8), but  
461 not with a specific chemotaxis system class. In a related observation, CheW.IA and  
462 CheW.IB account for nearly all single domain CheW proteins in nature. Both made  
463 strong direct connections to mcp.40H in Figure 5. CheW.IB also made direct  
464 connections with mcp.44H (strong) and mcp.36H (weaker), and CheW.IA made a direct  
465 connection (strong) with mcp.38H. Collectively, MCPs from 36H, 38H, 40H and 44H  
466 account for nearly 90% of all MCPs in nature (at least as encompassed by the RP35  
467 dataset). When viewed in this way, the phyletic couplings between such prolific  
468 components makes sense. However, we again speculate that the “unique” interactions

469 noted for the CheW.IA and IB *Types* are rooted in preferences for distinct  
470 chemoreceptors. Although both likely share a robust ability to interact with mcp.40H,  
471 CheW.IA may also be able to interact with mcp.38H, whereas CheW.IB may be able to  
472 interact with both mcp.44H and mcp.36H.

473 CheW.IA was directly linked to F5, F6, and F7.z chemotaxis system categories in  
474 Figure 5. CheW.IB was directly linked to F1 and F7 components in Figure 5 and sorted  
475 with F8 in Figure 3. As the F7.z category diverged from F7 and became associated with  
476 CheA.VII and CheA.VIII rather than CheA.I *Architectures* (Table 1), the CheW *Type*  
477 may have diverged in parallel from CheW.IB (F7) to CheW.1A (F7.z).

478 A recent report noted that the F7 system of *E. coli* likely evolved from merging  
479 ancient versions of the F6 and F7 systems.<sup>51</sup> Wuichet and Zhulin were unable to assign  
480 a characteristic chemoreceptor to the F6 system category.<sup>31</sup> Whereas the heatmap in  
481 Figure 3 implies that the appropriate MCP may be mcp.24H, the phyletic coupling  
482 network suggests that it could also be mcp.40H, via an indirect (but relatively strong)  
483 correlation with CheW.IA. Similarly, category F7 is strongly associated with mcp.36H  
484 (as previously reported<sup>31</sup>) but may also be linked to mcp.40H via CheW.IB.

485 CheW.IC (*Class 2*) makes up ~1% of CheW-like domains and shares  
486 characteristics of CheW-like domains found in both CheA and CheW proteins.<sup>36</sup>  
487 CheW.IC did not sort with any known chemotaxis system category in Figure 3 (N/A bloc  
488 below F4), perhaps affected by its low abundance in nature. The same rarity makes  
489 interpretation of the distribution of CheW.IC in Figure 3 challenging. However, CheW.IC  
490 was strongly linked with the MAC1 category in Figure 5 (corroborated upon close  
491 inspection of Figure 3). MAC systems incorporate both receptor and kinase functions



492 into a single protein species, implying that they do not need CheW scaffold proteins to  
493 bridge the two elements. It is not known if any MAC proteins form arrays in conjunction  
494 with CheW proteins. In principle, arrays of MAC proteins could provide previously  
495 described advantages (e.g., sensitive signal detection, amplification, integration) of a  
496 canonical chemoreceptor array, but array properties might be constrained by the one-to-  
497 one relationship between intramolecular chemoreceptor and kinase functions in MAC  
498 proteins. Arrays could also facilitate adaptation, for example by allowing the CheB  
499 and/or CheR domains of MAC1 proteins to modify adjacent receptors, or the separate  
500 CheR proteins of MAC2 systems to localize to the array by molecular brachiation.<sup>53</sup>

501 CheW.II sorted with ACF systems in Figure 2 but made its strongest connection  
502 to category F8 systems in Figure 5. In contrast to most other types of CheW proteins,  
503 CheW.II did not make strong direct connections to individual MCPs in Figure 5, implying  
504 that CheW.II proteins may be promiscuous and interact with multiple different types of  
505 chemoreceptors. An alternative interpretation equally consistent with the data is that  
506 CheW.II proteins do not interact with MCPs at all but have an as yet to be determined  
507 function. We are not aware of any experimental investigation of CheW.II proteins.  
508 CheA.IX did not sort with a specific chemotaxis system category in Figure 3 (N/A bloc  
509 below F4), but connected to CheW.II in Figure 5, suggesting an association with the  
510 category F8 and ACF systems. Similarly, CheW.III (category F9), CheA.XI (unassigned  
511 in Figure 3, N/A bloc below F4), and CheA.XII (category F4) were strongly  
512 interconnected in Figure 5, suggesting CheA.XI may belong to both the class F4 and F9  
513 chemotaxis systems. Belonging to multiple categories of chemotaxis systems could  
514 explain a failure to sort coherently in Figure 3. There also may be functional reasons for

515 these apparent interconnections. The CheA.IX *Architecture* lacks Hpt domains with  
516 phosphorylation sites, whereas the CheA.XI and CheA.XII *Architectures* lack the  
517 catalytic and ATP-binding HATPase\_c domain (Figure 2). Therefore, all three must  
518 interact with other CheA proteins to participate in phosphotransfer reactions.

519 CheV.I clustered with category F6 chemotaxis systems in Figure 3 but also  
520 appeared coincident with the F1 category. Figure 5 confirmed connections between  
521 CheV.I and the F1 and F6 categories. Figure 3 also showed a strong correlation  
522 between CheV.I and mcp.40H, which was again confirmed by Figure 5. However,  
523 CheV.I did not show a direct connection to any specific CheA *Architecture*. Curiously,  
524 besides a link with mcp.40H, the only other strong direct correlations formed by CheV.I  
525 involved the phosphatases chez.F6/chec.F1 and the methyltransferase cher.F1. The  
526 role(s) of CheV-lineage proteins and their attached receiver domains are poorly  
527 understood. Some evidence suggests that CheV is involved in the chemotaxis  
528 adaptation process<sup>32</sup>, making the correlation between CheV.I and the CheC/CheR  
529 components of the F1 class<sup>31</sup> understandable. However, the nature of the connection  
530 between CheV.I and chez.F6 is less clear and raises the concept of CheZ (and possibly  
531 the CheC of category F1) acting upon the attached phosphorylatable receiver domain of  
532 CheV.I in the capacity of a phosphatase. In fact, CheZ has phosphatase activity toward  
533 one of the three CheV proteins in *H. pylori*.<sup>54</sup> It is not known whether CheZ distinguishes  
534 between different CheV proteins based on their CheW-like and/or receiver domains.

535 The use of the PhyDCA approach has several disadvantages that must be  
536 considered. One is that the observed phyletic couplings do not necessarily correspond  
537 to direct biophysical interactions. Strong coupling may also represent events such as

538 genomic co-localization (a limitation the original authors circumvented by including an  
539 additional residue-level covariance analysis to predict likely direct interaction  
540 partners).<sup>45</sup> Because of the narrow perspective of our study (i.e., focusing on  
541 chemotaxis systems, rather than entire proteomes), we believe that this disadvantage  
542 was minimized. However, as can be seen in Figure 3, paralogous chemotaxis  
543 components are common in bacteria, particularly for chemoreceptors. Introducing a  
544 residue-level analysis step may facilitate the untangling of specific paralog  
545 interactions,<sup>45,55</sup> especially matching the various *Types* of CheW-like domains in CheA-,  
546 CheW-, and CheV-lineage proteins to their partner MCP components. Such an analysis  
547 would provide additional insight into the diverse chemotaxis systems found in nature.  
548 Additionally, PhyDCA (and many other phylogenetic profiling methods) relies on a  
549 binary presence/absence data structure to simplify data processing and interpretation.  
550 Excluding the substantial amount of paralogous protein data found in our microbial  
551 dataset very likely ignores valuable co-occurrence information. However, our two-  
552 pronged approach to the problem (using the full co-occurrence matrix to identify  
553 functional blocs/clusters in Figure 3 and using the transformed binary profile to create  
554 the simplified network representation in Figure 5) likely mitigates the issue.

### 555 **3.5 | Negative phyletic couplings reveal putative overlapping functionality among** 556 **specific chemotaxis components**

557 The PhyDCA model can also be used to predict negative phyletic couplings, i.e.,  
558 the presence of one component in a proteome disfavors the presence of another.<sup>45</sup>  
559 Logic suggests that components in such a scenario likely share overlapping (or at least  
560 closely related) functionalities (sometimes referred to as “alternative” solutions). For

561 example, the top negative coupling within Dataset S4 involved the components cher.F8  
562 and cher.Uncat, presumably because both methyltransferases serve highly similar  
563 functions. We sought to use the negative pairings to identify the overlapping roles of the  
564 more unusual *Architectures* containing CheW-like domains. The third strongest negative  
565 coupling involved CheW.II and CheW.III, leading to several related observations. None  
566 of the top negative phyletic pairings involving CheW.II or CheW.III feature any other  
567 CheW-lineage *Architecture*, implying, along with frequent co-occurrences with other  
568 CheW proteins in Figure 3, that the highly unusual CheW.II/III *Architectures* are not  
569 “alternative” solutions for the more standard CheW-lineage components (i.e., CheW.II  
570 does not replace two distinct single-domain CheW proteins), but likely serve novel  
571 functionalities as a result of some form of convergent evolution. Curiously, few other  
572 instances of anticorrelated components with presumably similar functions are present in  
573 the list of top negative phyletic pairs, with most entries involving disparate component  
574 types (and are therefore not likely to be consequences of convergent evolution). The  
575 only exceptions (from the top 4% strongest anticorrelated phyletic pairs) were CheW.IA  
576 with CheW.IC (both CheW-lineage scaffolds), chec.F1 with chez.F7 (both  
577 phosphatases), CheA.I with CheA.II (the two most abundant CheA-lineage kinases),  
578 cher.F10 with cher.F5 (both methyltransferases), cheb.F1 with cheb.F10 (both  
579 methylesterases), cher.F1 with cher.F8 (both methyltransferases), cheb.F7 with  
580 cheb.F8 (both methylesterases), and finally cheb.F10 with cheb.F5 (both  
581 methylesterases).

### 582 **3.6 | Insights into evolution and organization of prokaryotic chemotaxis systems**

583 CheW-like domains play a central role in the signal transduction systems that  
584 regulate prokaryotic chemotaxis by linking receptors and kinases into large arrays.  
585 Almost all CheW-like domains occur in a limited number of *Architectures* of CheA-,  
586 CheW-, and CheV-lineage proteins (Figure 2).<sup>36</sup> Furthermore, CheW-like domains have  
587 evolved into distinct functional *Classes* (Figure 1).<sup>36</sup> We inventoried chemotaxis proteins  
588 encoded by ~1900 species (Dataset S1) and examined their distribution in two  
589 dimensions: by chemotaxis system category<sup>31</sup> and by species. Successful unsupervised  
590 clustering of components into blocs (Figure 3) strongly suggested that the components  
591 were linked in both dimensions, leading to two central conclusions. First, combinations  
592 of chemotaxis systems encoded by individual species tend to be non-random (Figure 4,  
593 Table1, Dataset S2). Specific co-occurrence patterns and frequencies (Dataset S3)  
594 should provide insights into evolution of chemotaxis systems. Second, we inferred  
595 probable functional associations between each *Architecture* of CheA-, CheW-, and  
596 CheV-lineage proteins and specific categories of chemotaxis systems (Figure 5, Table  
597 2, Dataset S4). These assignments lay a foundation for future investigations into the  
598 mechanisms that underly apparent functional specialization of different chemotaxis  
599 protein *Architectures*.

600

601 **ACKNOWLEDGEMENTS**

602           We thank Emily N. Kennedy and Sarah A. Barr for their insightful input and  
603 helpful discussions.

604           This work was funded by National Institutes of Health grant GM050860 to Robert  
605 B. Bourret. The content is solely the responsibility of the authors and does not  
606 necessarily represent the official views of the National Institute of General Medical  
607 Sciences or the National Institutes of Health.

608 **REFERENCES**

- 609 1. Alvarez AF, Barba-Ostria C, Silva-Jiménez H, Georgellis D. Organization and mode  
610 of action of two component system signaling circuits from the various kingdoms of  
611 life. *Environ Microbiol.* 2016;18(10):3210-3226.
- 612 2. Zschiedrich CP, Keidel V, Szurmant H. Molecular mechanisms of two-component  
613 signal transduction. *J Mol Biol.* 2016;428(19):3752-3775.
- 614 3. Gao R, Stock AM. Biological insights from structures of two-component proteins.  
615 *Annu Rev Microbiol.* 2009;63(1):133-154.
- 616 4. Bourret RB, Kennedy EN, Foster CA, Sepúlveda VE, Goldman WE. A radical  
617 reimagining of fungal two-component regulatory systems. *Trends Microbiol.*  
618 2021;29(10):883-893.
- 619 5. Kirby JR. Chemotaxis-like regulatory systems: Unique roles in diverse bacteria.  
620 *Annu Rev Microbiol.* 2009;63(1):45-59.
- 621 6. Popp F, Armitage JP, Schüler D. Polarity of bacterial magnetotaxis is controlled by  
622 aerotaxis through a common sensory pathway. *Nat Commun.* 2014;5(1):5398.
- 623 7. Tohidifar P, Plutz MJ, Ordal GW, Rao CV. The mechanism of bidirectional pH taxis  
624 in *Bacillus subtilis*. *J Bacteriol.* 2020;202(4).
- 625 8. Vaknin A, Berg HC. Osmotic stress mechanically perturbs chemoreceptors in  
626 *Escherichia coli*. *Proc Natl Acad Sci U S A.* 2006;103(3):592-596.
- 627 9. Yang Y, Sourjik V. Opposite responses by different chemoreceptors set a tunable  
628 preference point in *Escherichia coli* pH taxis. *Mol Microbiol.* 2012;86(6):1482-1489.
- 629 10. Yoney A, Salman H. Precision and variability in bacterial temperature sensing.  
630 *Biophys J.* 2015;108(10):2427-2436.

- 631 11. Parkinson JS, Hazelbauer GL, Falke JJ. Signaling and sensory adaptation in  
632 *Escherichia coli* chemoreceptors: 2015 update. *Trends Microbiol.* 2015;23(5):257-  
633 266.
- 634 12. Yao J, Allen C. Chemotaxis is required for virulence and competitive fitness of the  
635 bacterial wilt pathogen *Ralstonia solanacearum*. *J Bacteriol.* 2006;188(10):3697-  
636 3708.
- 637 13. Butler SM, Camilli A. Going against the grain: Chemotaxis and infection in *Vibrio*  
638 *cholerae*. *Nat Rev Microbiol.* 2005;3(8):611-620.
- 639 14. Chandrashekar K, Kassem II, Rajashekar G. *Campylobacter jejuni* transducer like  
640 proteins: Chemotaxis and beyond. *Gut Microbes.* 2017;8(4):323-334.
- 641 15. Josenhans C, Suerbaum S. The role of motility as a virulence factor in bacteria. *Int J*  
642 *Med Microbiol.* 2002;291(8):605-614.
- 643 16. Kreling V, Falcone FH, Kehrenberg C, Hensel A. *Campylobacter sp.*: Pathogenicity  
644 factors and prevention methods—new molecular targets for innovative antivirulence  
645 drugs? *Appl Microbiol Biotechnol.* 2020;104(24):10409-10436.
- 646 17. Sourjik V, Wingreen NS. Responding to chemical gradients: Bacterial chemotaxis.  
647 *Curr Opin Cell Biol.* 2012;24(2):262-268.
- 648 18. Khan S, Spudich JL, McCray JA, Trentham DR. Chemotactic signal integration in  
649 bacteria. *Proc Natl Acad Sci U S A.* 1995;92(21):9757-9761.
- 650 19. Falke JJ, Bass RB, Butler SL, Chervitz SA, Danielson MA. The two-component  
651 signaling pathway of bacterial chemotaxis: a molecular view of signal transduction  
652 by receptors, kinases, and adaptation enzymes. *Annu Rev Cell Dev Biol.*  
653 1997;13:457-512.



- 654 20. Zhao R, Collins EJ, Bourret RB, Silversmith RE. Structure and catalytic mechanism  
655 of the *E. coli* chemotaxis phosphatase CheZ. *Nat Struct Biol.* 2002;9(8):570-575.
- 656 21. Bi S, Sourjik V. Stimulus sensing and signal processing in bacterial chemotaxis. *Curr*  
657 *Opin Microbiol.* 2018;45:22-29.
- 658 22. Huang Z, Pan X, Xu N, Guo M. Bacterial chemotaxis coupling protein: Structure,  
659 function and diversity. *Microbiol Res.* 2019;219:40-48.
- 660 23. Pinas GE, DeSantis MD, Cassidy CK, Parkinson JS. Hexameric rings of the  
661 scaffolding protein CheW enhance response sensitivity and cooperativity in  
662 *Escherichia coli* chemoreceptor arrays. *Sci Signal.* 2022;15(718):eabj1737.
- 663 24. Bilwes AM, Alex LA, Crane BR, Simon MI. Structure of CheA, a signal-transducing  
664 histidine kinase. *Cell.* 1999;96(1):131-141.
- 665 25. Park S-Y, Borbat PP, Gonzalez-Bonet G, et al. Reconstruction of the chemotaxis  
666 receptor–kinase assembly. *Nat Struct Mol Biol.* 2006;13(5):400-407.
- 667 26. Ortega DR, Mo G, Lee K, et al. Conformational coupling between receptor and  
668 kinase binding sites through a conserved salt bridge in a signaling complex scaffold  
669 protein. *PLOS Comp Biol.* 2013;9(11):e1003337.
- 670 27. Wang X, Vu A, Lee K, Dahlquist FW. CheA-receptor interaction sites in bacterial  
671 chemotaxis. *J Mol Biol.* 2012;422(2):282-290.
- 672 28. Boukhvalova MS, Dahlquist FW, Stewart RC. CheW binding interactions with CheA  
673 and Tar: Importance for chemotaxis signaling in *Escherichia coli*. *J Biol Chem.*  
674 2002;277(25):22251-22259.

- 675 29. Bellenger K, Ma X, Shi W, Yang Z. A CheW homologue is required for *Myxococcus*  
676 *xanthus* fruiting body development, social gliding motility, and fibril biogenesis. *J*  
677 *Bacteriol.* 2002;184(20):5654-5660.
- 678 30. Martin AC, Wadhams GH, Armitage JP. The roles of the multiple CheW and CheA  
679 homologues in chemotaxis and in chemoreceptor localization in *Rhodobacter*  
680 *sphaeroides*. *Mol Microbiol.* 2001;40(6):1261-1272.
- 681 31. Wuichet K, Zhulin IB. Origins and diversification of a complex signal transduction  
682 system in prokaryotes. *Sci Signal.* 2010;3(128):ra50-ra50.
- 683 32. Alexander RP, Lowenthal AC, Harshey RM, Ottemann KM. CheV: CheW-like  
684 coupling proteins at the core of the chemotaxis signaling network. *Trends Microbiol.*  
685 2010;18(11):494-503.
- 686 33. Lowenthal AC, Simon C, Fair AS, et al. A fixed-time diffusion analysis method  
687 determines that the three *cheV* genes of *Helicobacter pylori* differentially affect  
688 motility. *Microbiology.* 2009;155(Pt 4):1181-1191.
- 689 34. Yang W, Alvarado A, Glatter T, Ringgaard S, Briegel A. Baseplate variability of  
690 *Vibrio cholerae* chemoreceptor arrays. *Proc Natl Acad Sci U S A.*  
691 2018;115(52):13365-13370.
- 692 35. Ortega DR, Zhulin IB. Evolutionary genomics suggests that CheV is an additional  
693 adaptor for accommodating specific chemoreceptors within the chemotaxis signaling  
694 complex. *PLOS Comp Biol.* 2016;12(2):e1004723.
- 695 36. Vass LR, Bascum KM, Bourret RB, Foster CA. Generalized strategy to analyze  
696 domains in the context of parent protein architecture: Case study of CheW. *Proteins.*  
697 2022;Submitted.

- 698 37. Chen C, Natale DA, Finn RD, et al. Representative proteomes: A stable, scalable  
699 and unbiased proteome set for sequence analysis and functional annotation. *PLoS*  
700 *One*. 2011;6(4):e18910-e18910.
- 701 38. Mistry J, Chuguransky S, Williams L, et al. Pfam: The protein families database in  
702 2021. *Nucleic Acids Res*. 2020;49(D1):D412-D419.
- 703 39. Gumerov VM, Ortega DR, Adebali O, Ulrich LE, Zhulin IB. MiST 3.0: An updated  
704 microbial signal transduction database with an emphasis on chemosensory systems.  
705 *Nucleic Acids Res*. 2019;48(D1):D459-D464.
- 706 40. Wuichet K, Alexander RP, Zhulin IB. Comparative genomic and protein sequence  
707 analyses of a complex system controlling bacterial chemotaxis. *Methods Enzymol*.  
708 2007;422:1-31.
- 709 41. Eddy SR. Accelerated Profile HMM Searches. *PLOS Comp Biol*.  
710 2011;7(10):e1002195.
- 711 42. Gu Z, Eils R, Schlesner M. Complex heatmaps reveal patterns and correlations in  
712 multidimensional genomic data. *Bioinformatics*. 2016;32(18):2847-2849.
- 713 43. Chamberlain SA, Szocs E. taxize: taxonomic search and retrieval in R. *F1000Res*.  
714 2013;2:191.
- 715 44. Schoch CL, Ciufo S, Domrachev M, et al. NCBI Taxonomy: a comprehensive update  
716 on curation, resources and tools. *Database (Oxford)*. 2020;2020.
- 717 45. Croce G, Gueudré T, Ruiz Cuevas MV, et al. A multi-scale coevolutionary approach  
718 to predict interactions between protein domains. *PLOS Comp Biol*.  
719 2019;15(10):e1006891.

- 720 46. Fruchterman TMJ, Reingold EM. Graph drawing by force-directed placement.  
721 *Software Pract Exper.* 1991;21(11):1129-1164.
- 722 47. Epskamp S, Cramer AOJ, Waldorp LJ, Schmittmann VD, Borsboom D. qgraph:  
723 Network visualizations of relationships in psychometric data. *J Stat Softw.*  
724 2012;48(4):1 - 18.
- 725 48. *ggraph: An implementation of grammar of graphics for graphs and networks*  
726 [computer program]. Version 2.0.52021.
- 727 49. Alexander RP, Zhulin IB. Evolutionary genomics reveals conserved structural  
728 determinants of signaling and adaptation in microbial chemoreceptors. *Proc Natl*  
729 *Acad Sci U S A.* 2007;104(8):2885-2890.
- 730 50. Silversmith RE. Auxiliary phosphatases in two-component signal transduction. *Curr*  
731 *Opin Microbiol.* 2010;13(2):177-183.
- 732 51. Ortega DR, Yang W, Subramanian P, et al. Repurposing a chemosensory  
733 macromolecular machine. *Nat Commun.* 2020;11(1):2041.
- 734 52. Gumerov VM, Andrianova EP, Zhulin IB. Diversity of bacterial chemosensory  
735 systems. *Curr Opin Microbiol.* 2021;61:42-50.
- 736 53. Levin MD, Shimizu TS, Bray D. Binding and diffusion of CheR molecules within a  
737 cluster of membrane receptors. *Biophys J.* 2002;82(4):1809-1817.
- 738 54. Lertsethtakarn P, Ottemann KM. A remote CheZ orthologue retains phosphatase  
739 function. *Mol Microbiol.* 2010;77(1):225-235.
- 740 55. Gueudré T, Baldassi C, Zamparo M, Weigt M, Pagnani A. Simultaneous  
741 identification of specifically interacting paralogs and interprotein contacts by direct  
742 coupling analysis. *Proc Natl Acad Sci U S A.* 2016;113(43):12186-12191.

743 56. Adapted from “Flow Chart (3 Levels, Vertical) 3”, by BioRender.com (2022).

744 Retrieved from <https://app.biorender.com/biorender-templates>

745

746 **TABLE 1. Most common chemotaxis system category combinations in Representative Proteomes<sup>a</sup>**

| 747 | <u>Br. 2A<sup>b</sup></u>                   | <u>Br. 2C</u> | <u>Branch 2B</u> | <u>Branch 1</u>         | <u>Branch 3</u> |      |      |       | Category | % of           | RP Cluster |             |
|-----|---------------------------------------------|---------------|------------------|-------------------------|-----------------|------|------|-------|----------|----------------|------------|-------------|
| 748 | F1 F2                                       | F5 F6         | F4 F9 F10        | F7.z <sup>c</sup> F7 F8 | ACF Tfp         | MAC1 | MAC2 | Uncat | Count    | Combination    | Proteomes  | in Figure 4 |
| 749 | <i>Single systems:</i>                      |               |                  |                         |                 |      |      |       |          |                |            |             |
| 750 | +                                           |               |                  |                         |                 |      |      |       | 304      | F1             | 16.9       | 6           |
| 751 |                                             | +             |                  |                         |                 |      |      |       | 87       | F5             | 4.8        | 12 right    |
| 752 |                                             |               | +                |                         |                 |      |      |       | 18       | F6             | 1.0        | 10 middle   |
| 753 |                                             |               |                  | +                       |                 |      |      |       | 74       | F7             | 4.1        | 8 right     |
| 754 |                                             |               |                  |                         | +               |      |      |       | 29       | ACF            | 1.6        | 15          |
| 755 |                                             |               |                  |                         |                 | +    |      |       | 17       | Tfp            | 1.0        | 9 left      |
| 756 |                                             |               |                  |                         |                 |      | +    |       | 106      | MAC1           | 5.9        | 18 left     |
| 757 |                                             |               |                  |                         |                 |      |      | +     | 46       | MAC2           | 2.6        | 14 right    |
| 758 |                                             |               |                  |                         |                 |      |      |       | 9        | Uncat          | 0.5        | 3 right     |
| 759 | <i>Combinations within the same Branch:</i> |               |                  |                         |                 |      |      |       |          |                |            |             |
| 760 | +                                           | +             |                  |                         |                 |      |      |       | 9        | F1 + F2        | 0.5        | 6 left      |
| 761 |                                             |               |                  | +                       | +               | +    |      |       | 44       | F7.z + F7 + F8 | 2.5        | 7 middle    |
| 762 |                                             |               |                  | +                       | +               |      |      |       | 32       | F7 + F7.z      | 1.8        | 7 left      |
| 763 |                                             |               |                  |                         | +               | +    |      |       | 14       | F7 + F8        | 0.8        | 8 left      |
| 764 |                                             |               |                  |                         |                 |      | +    | +     | 46       | MAC1 + MAC2    | 2.6        | 17 left     |
| 765 | <i>Combinations between Branches:</i>       |               |                  |                         |                 |      |      |       |          |                |            |             |
| 766 | +                                           |               |                  |                         | +               |      |      |       | 95       | F1 + F7        | 5.3        | 4 right     |
| 767 | +                                           | +             |                  |                         |                 |      |      |       | 28       | F1 + F5        | 1.6        | 5 left      |
| 768 | +                                           |               | +                |                         |                 |      |      |       | 12       | F1 + F6        | 0.7        | 10 left     |
| 769 | +                                           |               |                  | +                       |                 |      |      |       | 19       | F1 + F9        | 1.1        | 1           |
| 770 | +                                           |               |                  |                         |                 |      | +    |       | 16       | F1 + MAC1      | 0.9        | 18 right    |
| 771 | +                                           |               |                  |                         |                 |      | +    | +     | 14       | F1 + MAC1      | 0.8        | 17 right    |
| 772 |                                             |               |                  |                         |                 |      |      |       |          | + MAC2         |            |             |
| 773 | +                                           |               |                  |                         |                 |      |      | +     | 56       | F1 + MAC2      | 3.1        | 14 left     |
| 774 | +                                           |               |                  |                         |                 |      |      |       | 17       | F1 + Uncat     | 1.0        | 3 left      |
| 775 |                                             | +             |                  |                         | +               |      |      |       | 19       | F5 + F7        | 1.1        | 12 middle   |
| 776 |                                             | +             |                  |                         |                 |      | +    |       | 20       | F5 + MAC1      | 1.1        | 12 left     |
| 777 |                                             |               | +                |                         |                 | +    |      |       | 11       | F6 + F7        | 0.6        | 10 right    |
| 778 |                                             |               | +                |                         |                 | +    |      | +     | 9        | F6 + F7 + Tfp  | 0.5        | 9 right     |

|     |  |   |   |   |   |    |                |     |          |
|-----|--|---|---|---|---|----|----------------|-----|----------|
| 779 |  |   |   | + | + | 28 | ACF + MAC1     | 1.6 | 16       |
| 780 |  | + | + | + | + | 14 | F7.z + F7 + F8 | 0.8 | 7 right  |
| 781 |  |   |   |   |   |    | + MAC1         |     |          |
| 782 |  | + | + | + | + | 9  | F7.z + F7 + F8 | 0.5 | 7 middle |
| 783 |  |   |   |   |   |    | + ACF          |     |          |
| 784 |  |   |   | + | + | 24 | F7 + MAC1      | 1.3 | 8 middle |
| 785 |  |   |   | + | + | 16 | F7 + F8 + MAC1 | 0.9 | 8 left   |

786 <sup>a</sup>From Dataset S2, which includes 1797 proteomes. The 90% of combinations that each represent < 0.5% of the total  
787 dataset are not shown in this table.

788 <sup>b</sup>The phylogenetic tree in Figure 7 of Wuichet & Zhulin<sup>31</sup> that forms the basis for classification of chemotaxis system  
789 categories has three main branches, arbitrarily numbered here. Branch 2 has three main sub-branches.

790 <sup>c</sup>The subset of F7 systems that contain CheZ. See Figure 3.

791

792 **TABLE 2. Assignment of CheA and CheW protein Architectures to chemotaxis system categories**

| 793 | Protein                          | CheW-like                        | Chemotaxis                   | Evidence for Chemotaxis System Assignment |          |          |
|-----|----------------------------------|----------------------------------|------------------------------|-------------------------------------------|----------|----------|
| 794 | <i>Architecture</i> <sup>a</sup> | Domain <i>Class</i> <sup>b</sup> | System Category <sup>c</sup> | Figure 6 of <sup>31</sup>                 | Figure 3 | Figure 5 |
| 795 | CheA.I                           | 3                                | F7                           |                                           | +        | +        |
| 796 | CheA.I                           | 3                                | F8                           |                                           |          | +        |
| 797 | CheA.II                          | 3                                | F1                           |                                           | +        | +        |
| 798 | CheA.III                         | 3                                | ACF                          | +                                         | +        | +        |
| 799 | CheA.III                         | 3                                | F3                           | + <sup>d</sup>                            |          |          |
| 800 | CheA.IV                          | 3                                | ACF                          | +                                         | +        | +        |
| 801 | CheA.IV                          | 3                                | F3                           | + <sup>d</sup>                            |          |          |
| 802 | CheA.V                           | 3, 5                             | F5                           | e                                         | +        | +        |
| 803 | CheA.VI                          | 3, 5                             | F5                           | +                                         | +        | +        |
| 804 | CheA.VII                         | 4                                | F7.z <sup>f</sup>            | e                                         | +        | +        |
| 805 | CheA.VIII                        | 3                                | F7.z                         | e                                         | +        | +        |
| 806 | CheA.IX                          | 3                                | Uncertain (F8 and ACF?)      |                                           |          | +        |
| 807 | CheA.X                           | 4                                | Unassigned <sup>g</sup>      | e                                         |          |          |
| 808 | CheA.XI                          | 3                                | Uncertain (F4 and F9?)       |                                           |          | +        |
| 809 | CheA.XII                         | 3                                | F4                           | +                                         | +        | +        |
| 810 |                                  |                                  |                              |                                           |          |          |
| 811 | CheV.I                           | 1                                | F6                           |                                           | +        | +        |
| 812 | CheV.I                           | 1                                | F1                           |                                           |          | +        |
| 813 |                                  |                                  |                              |                                           |          |          |
| 814 | CheW.IA                          | 6                                | F5, F6, F7.z                 |                                           |          | +        |
| 815 | CheW.IB                          | 1                                | F8                           |                                           | +        |          |
| 816 | CheW.IB                          | 1                                | F1, F7                       |                                           |          | +        |
| 817 | CheW.IC                          | 2                                | MAC1                         |                                           |          | +        |
| 818 | CheW.II                          | 1                                | ACF                          | e                                         | +        |          |
| 819 | CheW.II                          | 1                                | F8                           | e                                         |          | +        |
| 820 | CheW.III                         | 1                                | F9                           | +                                         | +        | +        |

821 <sup>a</sup>Outlined in Figure 2. The CheW.I *Architecture* splits into three *Types*.<sup>36</sup>

822 <sup>b</sup>From <sup>36</sup>. The two CheW-like domains in CheA.V and CheA.VI *Architectures* belong to different *Classes*.

823 <sup>c</sup>Our sample does not contain enough representatives for analysis of system categories F3, F11-F17.



824 <sup>d</sup>Wuichet & Zhulin<sup>31</sup> noted CheA proteins modified only by C-terminal receiver domains (CheA.III or CheA.IV) were  
825 consistently observed in F3 chemotaxis systems. However, our PhyDCA scores in Dataset S4 do not support linkage of  
826 either the CheA.III or CheA.IV *Architectures* to either F3 or F4 chemotaxis systems.

827 <sup>e</sup>Although the CheA.V, CheA.VII, CheA.VIII, CheA.X, and CheW.II *Architectures* contain additional domains with respect  
828 to canonical CheA or CheW *Architectures* and are sufficiently abundant to be included in <sup>36</sup>, these *Architectures* were  
829 apparently not observed sufficiently consistently in specific chemotaxis system categories to be noted by Wuichet &  
830 Zhulin<sup>31</sup>, who analyzed a much smaller sample size.

831 <sup>f</sup>The subset of F7 chemotaxis systems that contain CheZ. See Figure 3.

832 <sup>g</sup>Did not sort with a specific chemotaxis system category in Figure 3 and did not make sufficiently strong connections to be  
833 included in Figure 5.

834

835 **FIGURE LEGENDS**

836 **FIGURE 1. Summary of classification scheme for CheW-like domains used in** <sup>36</sup>.

837 Note that Wuichet & Zhulin refer to 19 different kinds of chemotaxis systems as  
838 “classes”.<sup>31</sup> To avoid confusion, in this report we use “*Classes*” for CheW-like domains  
839 and “categories” for chemotaxis systems. Created with BioRender.com.<sup>56</sup>

840 **FIGURE 2. Major Architectures of proteins that contain CheW-like domains** (from  
841 <sup>36</sup>). CheA-lineage *Architectures* are designated by a Roman numeral suffix in order of  
842 decreasing abundance. CheW-lineage *Architectures* are designated by a Roman  
843 numeral suffix indicating the number of CheW-like domains. For *Architectures* with  
844 multiple CheW-like domains, the *Contexts* of CheW-like domains within an *Architecture*  
845 are designated by an Arabic numeral suffix indicating N- to C-terminal order (not  
846 shown). The CheW.I *Context* includes sequences of three distinct *Types*, designated  
847 CheW.IA, CheW.IB, and CheW.IC (not shown).

848 **FIGURE 3. Co-occurrences of individual chemotaxis components in RP35**  
849 **representative proteome set.** Total occurrence counts were used. Components with <  
850 20 occurrences were excluded. Column annotations were shaded by Phyla (groups with  
851 < 10 occurrences are unlabeled) and Class (groups with < 10 occurrences are  
852 unlabeled). Notable organisms were tagged. Results were split by dendrogram height  
853 into functional “blocs” by clustering both proteomes (columns) and chemotaxis  
854 components (rows). Representative Proteome clusters were labeled as 1-18, whereas  
855 component blocs were labeled with most likely chemotaxis system category. Row  
856 dendrogram not shown.

857 **FIGURE 4. Simplified co-occurrence schematic of chemotaxis system categories**  
858 **in RP35 representative proteome set.** A binary presence/absence scheme was used  
859 for visualization. A chemotaxis system category was determined to be present in a  
860 given proteome if at least one of the following components was detected of the  
861 appropriate category: CheB/C/D/R/Z. CheA/V/W and MCP components were excluded  
862 from the analysis, because some of these components function with more than one  
863 chemotaxis system category. Notable organisms were labelled. Row order was  
864 maintained for consistency with Figure 3. Results were split by dendrogram height into  
865 functional “blocs” by clustering proteomes (columns). However, because the datasets  
866 upon which Figures 3 and 4 are based are different, the resulting proteome clusters and  
867 cluster numbers are different than in Figure 3.

868 **FIGURE 5. Network representation of inferred phyletic couplings between**  
869 ***Architectures* containing CheW-like domains and remaining chemotaxis system**  
870 **components.** Co-occurrence data of chemotaxis components extracted from the RP35  
871 representative proteome set were converted to a binary phylogenetic profile matrix.  
872 Phyletic Direct Coupling Analysis (PhyDCA) was used to quantify the favorability  
873 (correlation) of chemotaxis components co-occurring within the same organism. Strong  
874 favorability/high coupling typically corresponds to a cellular function (i.e., chemotaxis)  
875 requiring both components, though not necessarily to a direct biophysical interaction.  
876 The top 125 positive co-evolutionary pairings were used to construct a graph based on  
877 phyletic coupling strength. Architectural assignments correspond to those included in  
878 Figure 1 (i.e., identical thresholds). Edge width was scaled with phyletic coupling  
879 strength. Notes: *Architecture* CheA.X did not appear in the top 125 strongest phyletic

880 couplings and was excluded from the graph. cheb.F2, cher.F2, and mcp.48H formed a  
881 cluster disconnected from the rest of the network, but all three coupled to CheA.II at  
882 slightly lower strengths (top ~10%) (Dataset S4).

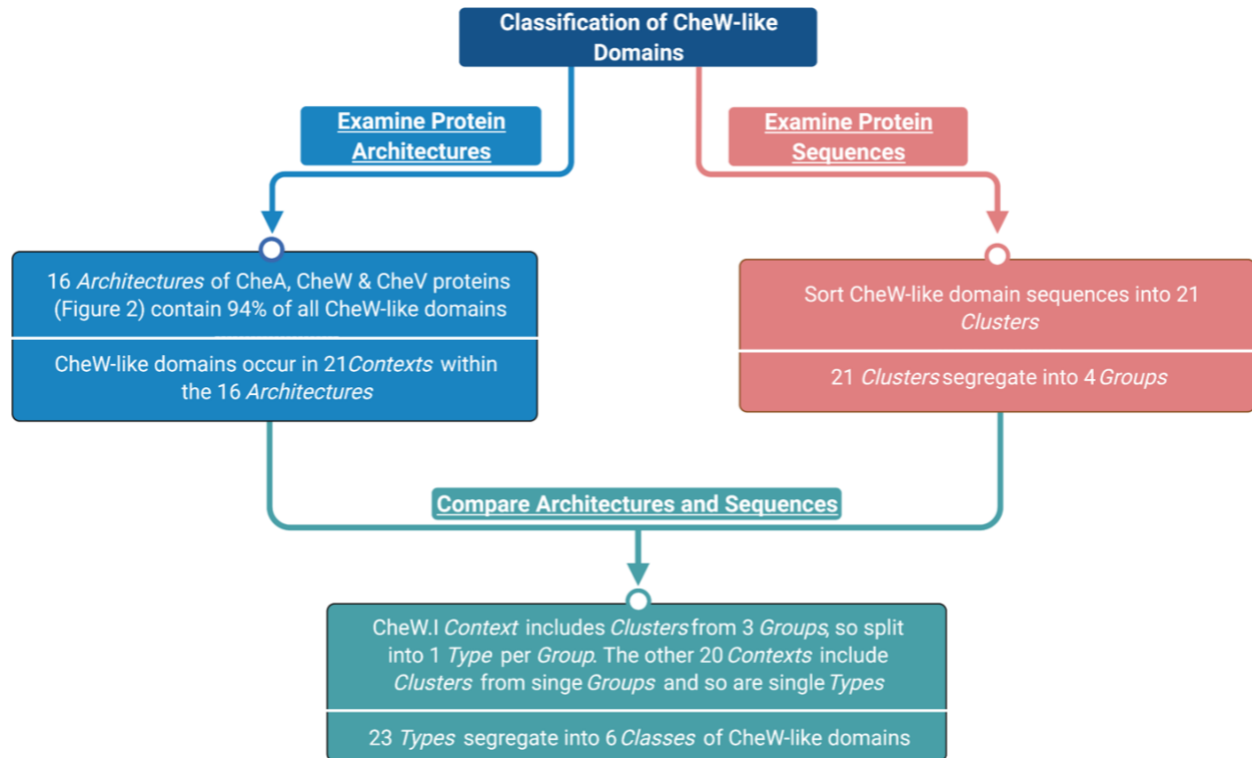

883

884 **FIGURE 1. Summary of classification scheme for CheW-like domains used in** <sup>36</sup>.  
885 Note that Wuichet & Zhulin refer to 19 different kinds of chemotaxis systems as  
886 “classes”.<sup>31</sup> To avoid confusion, in this report we use “Classes” for CheW-like domains  
887 and “categories” for chemotaxis systems. Created with BioRender.com.<sup>56</sup>

888

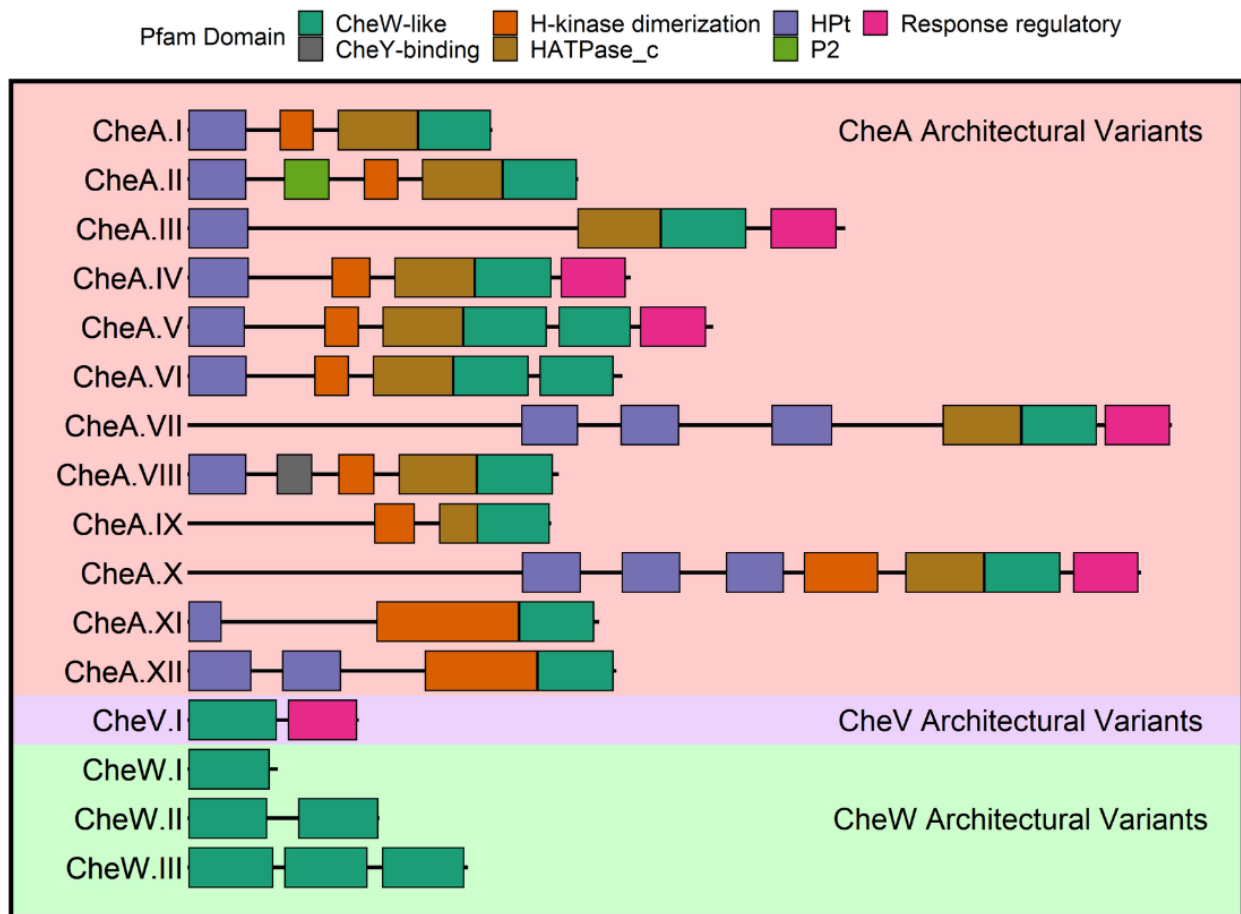

889

890 **FIGURE 2. Major Architectures of proteins that contain CheW-like domains** (from  
 891 <sup>36</sup>). CheA-lineage Architectures are designated by a Roman numeral suffix in order of  
 892 decreasing abundance. CheW-lineage Architectures are designated by a Roman  
 893 numeral suffix indicating the number of CheW-like domains. For Architectures with  
 894 multiple CheW-like domains, the Contexts of CheW-like domains within an Architecture  
 895 are designated by an Arabic numeral suffix indicating N- to C-terminal order (not  
 896 shown). The CheW.I Context includes sequences of three distinct Types, designated  
 897 CheW.IA, CheW.IB, and CheW.IC (not shown).



901 20 occurrences were excluded. Column annotations were shaded by Phyla (groups with  
902 < 10 occurrences are unlabeled) and Class (groups with < 10 occurrences are  
903 unlabeled). Notable organisms were tagged. Results were split by dendrogram height  
904 into functional “blocs” by clustering both proteomes (columns) and chemotaxis  
905 components (rows). Representative Proteome clusters were labeled as 1-18, whereas  
906 component blocs were labeled with most likely chemotaxis system category. Row  
907 dendrogram not shown.



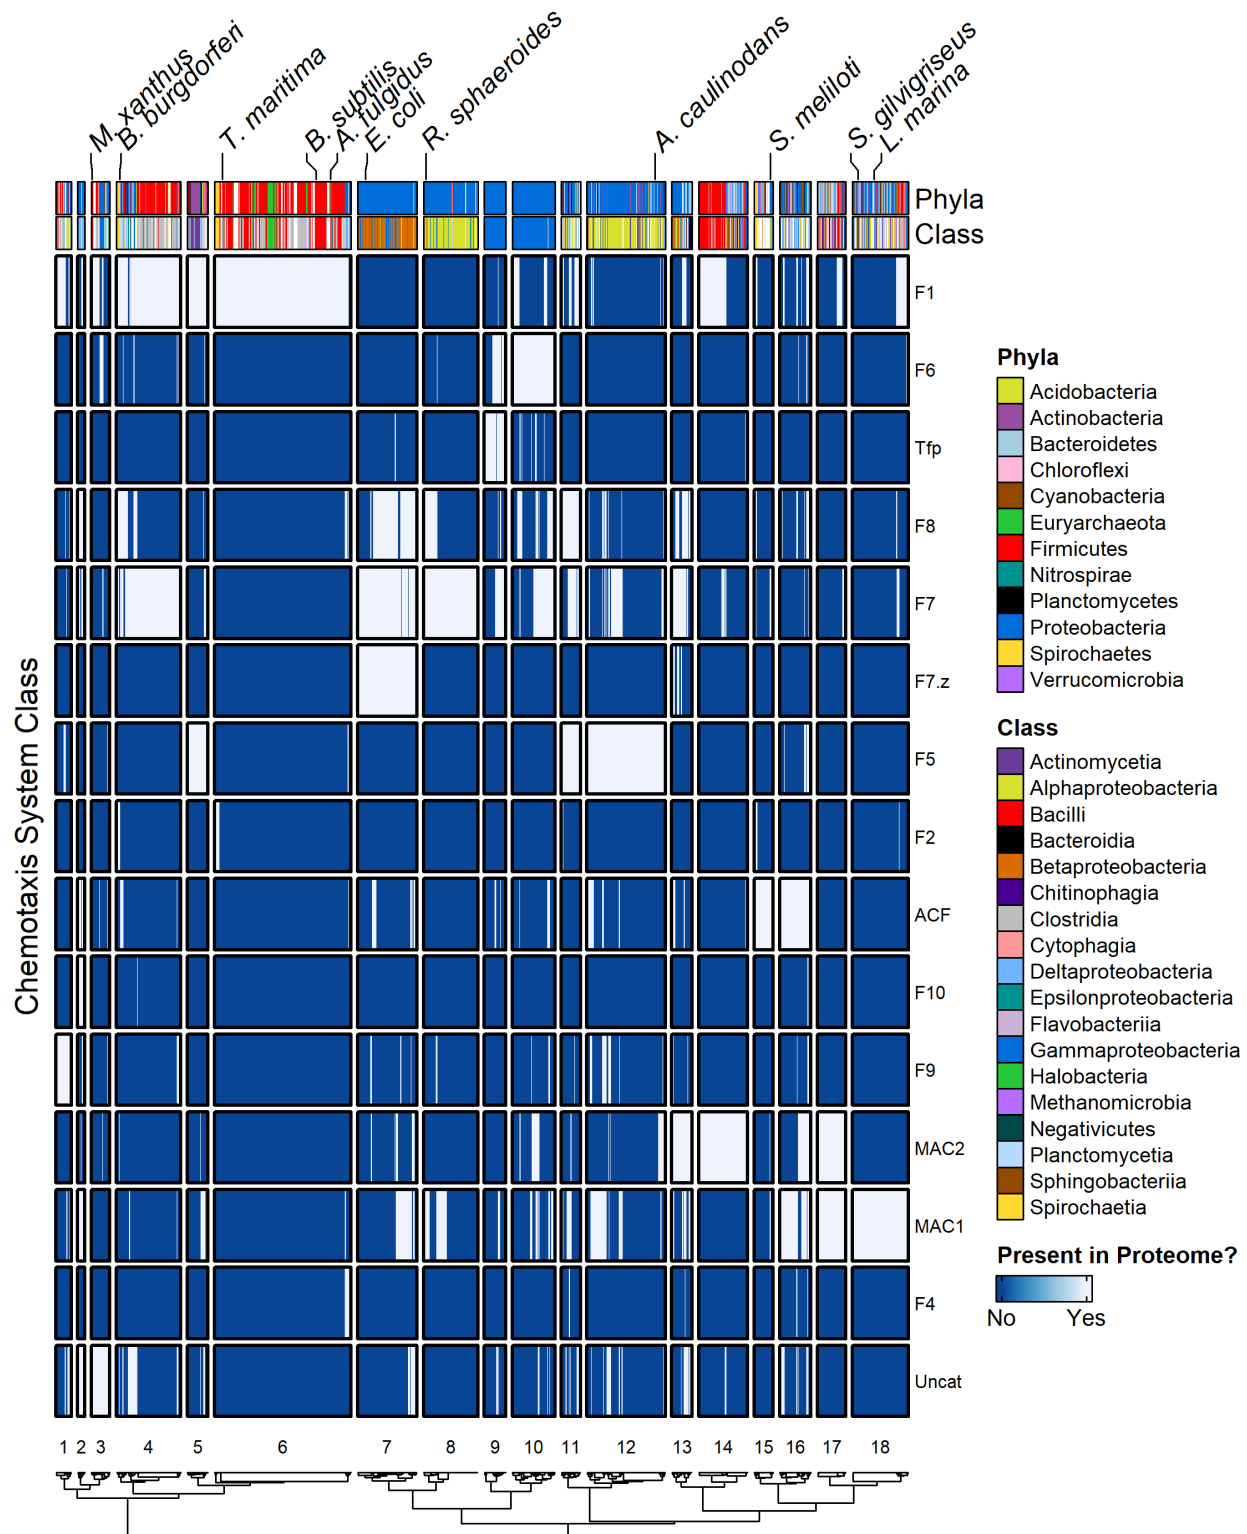

911 for visualization. A chemotaxis system category was determined to be present in a  
912 given proteome if at least one of the following components was detected of the  
913 appropriate category: CheB/C/D/R/Z. CheA/V/W and MCP components were excluded  
914 from the analysis, because some of these components function with more than one  
915 chemotaxis system category. Notable organisms were labelled. Row order was  
916 maintained for consistency with Figure 3. Results were split by dendrogram height into  
917 functional “blocs” by clustering proteomes (columns). However, because the datasets  
918 upon which Figures 3 and 4 are based are different, the resulting proteome clusters and  
919 cluster numbers are different than in Figure 3.

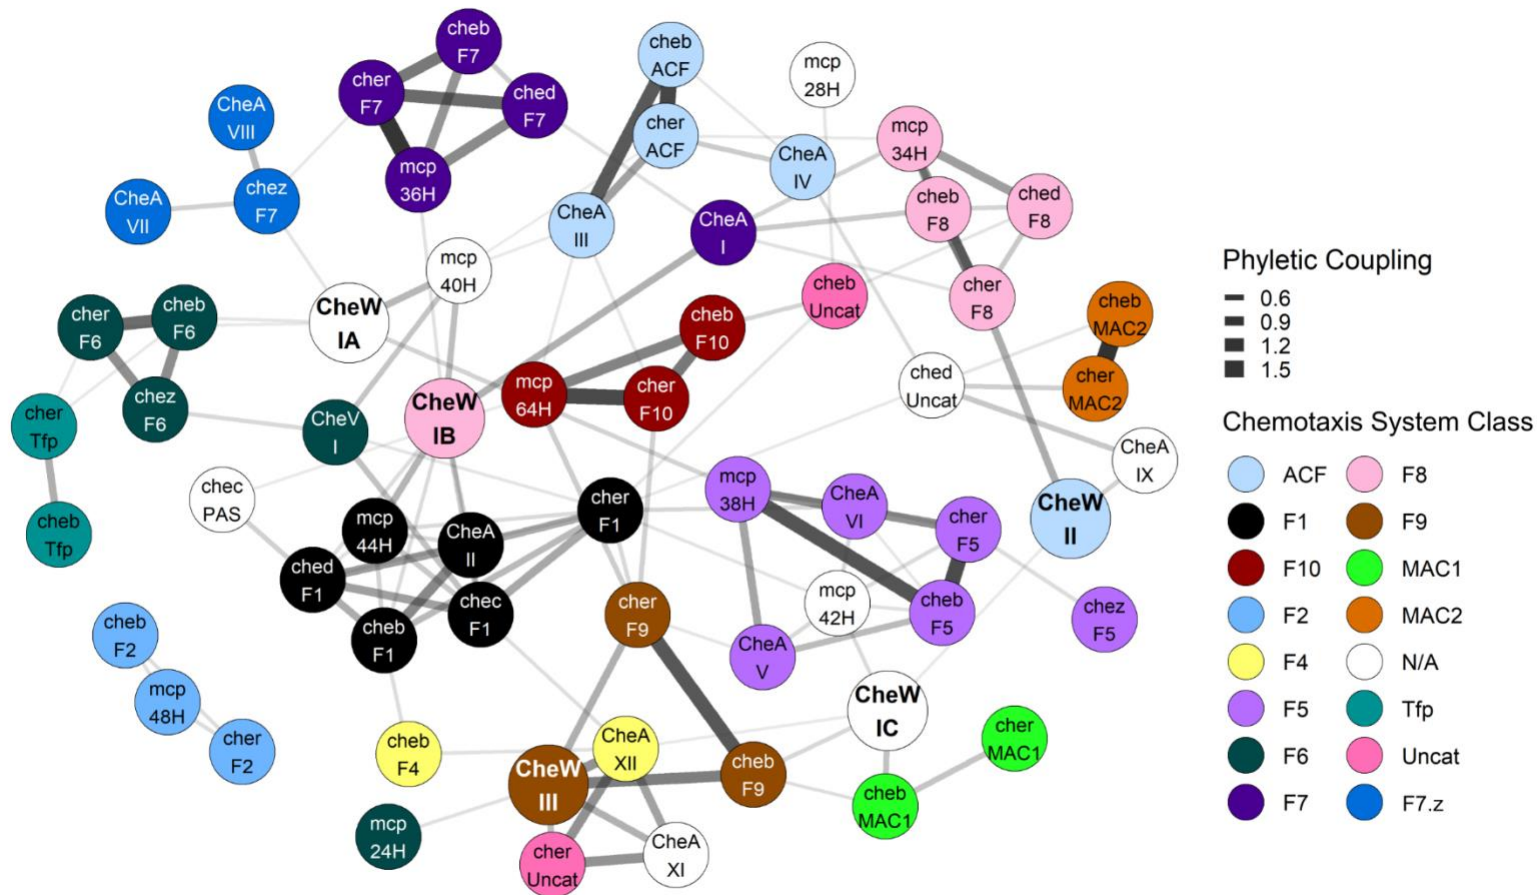

920

921 **FIGURE 5. Network representation of inferred phyletic couplings between *Architectures* containing CheW-like**  
 922 **domains and remaining chemotaxis system components.** Co-occurrence data of chemotaxis components extracted  
 923 from the RP35 representative proteome set were converted to a binary phylogenetic profile matrix. Phyletic Direct  
 924 Coupling Analysis (PhyDCA) was used to quantify the favorability (correlation) of chemotaxis components co-occurring  
 925 within the same organism. Strong favorability/high coupling typically corresponds to a cellular function (i.e., chemotaxis)

926 requiring both components, though not necessarily to a direct biophysical interaction. The top 125 positive co-evolutionary  
927 pairings were used to construct a graph based on phyletic coupling strength. Architectural assignments correspond to  
928 those included in Figure 1 (i.e., identical thresholds). Edge width was scaled with phyletic coupling strength. Notes:  
929 *Architecture* CheA.X did not appear in the top 125 strongest phyletic couplings and was excluded from the graph.  
930 cheb.F2, cher.F2, and mcp.48H formed a cluster disconnected from the rest of the network, but all three coupled to  
931 CheA.II at slightly lower strengths (top ~10%) (Dataset S4).
